# Supplementary material
Source: PubMed Central journal article supplement (PMC3425446)

Supplementary Figure 1

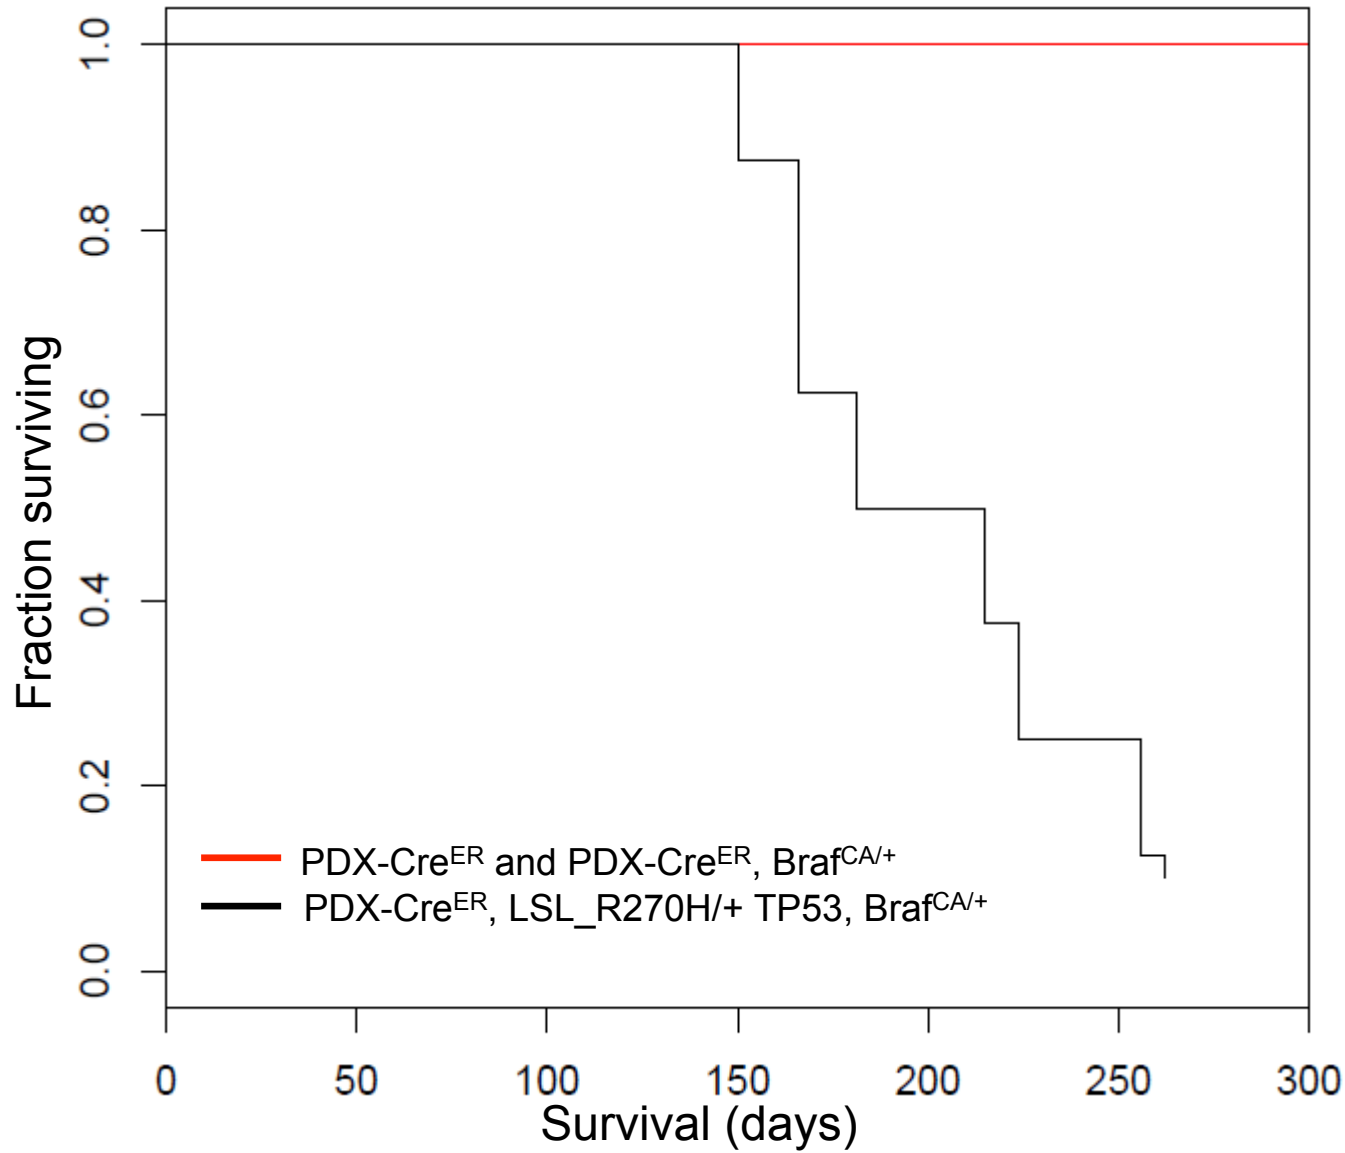

## Supplementary Figure 2

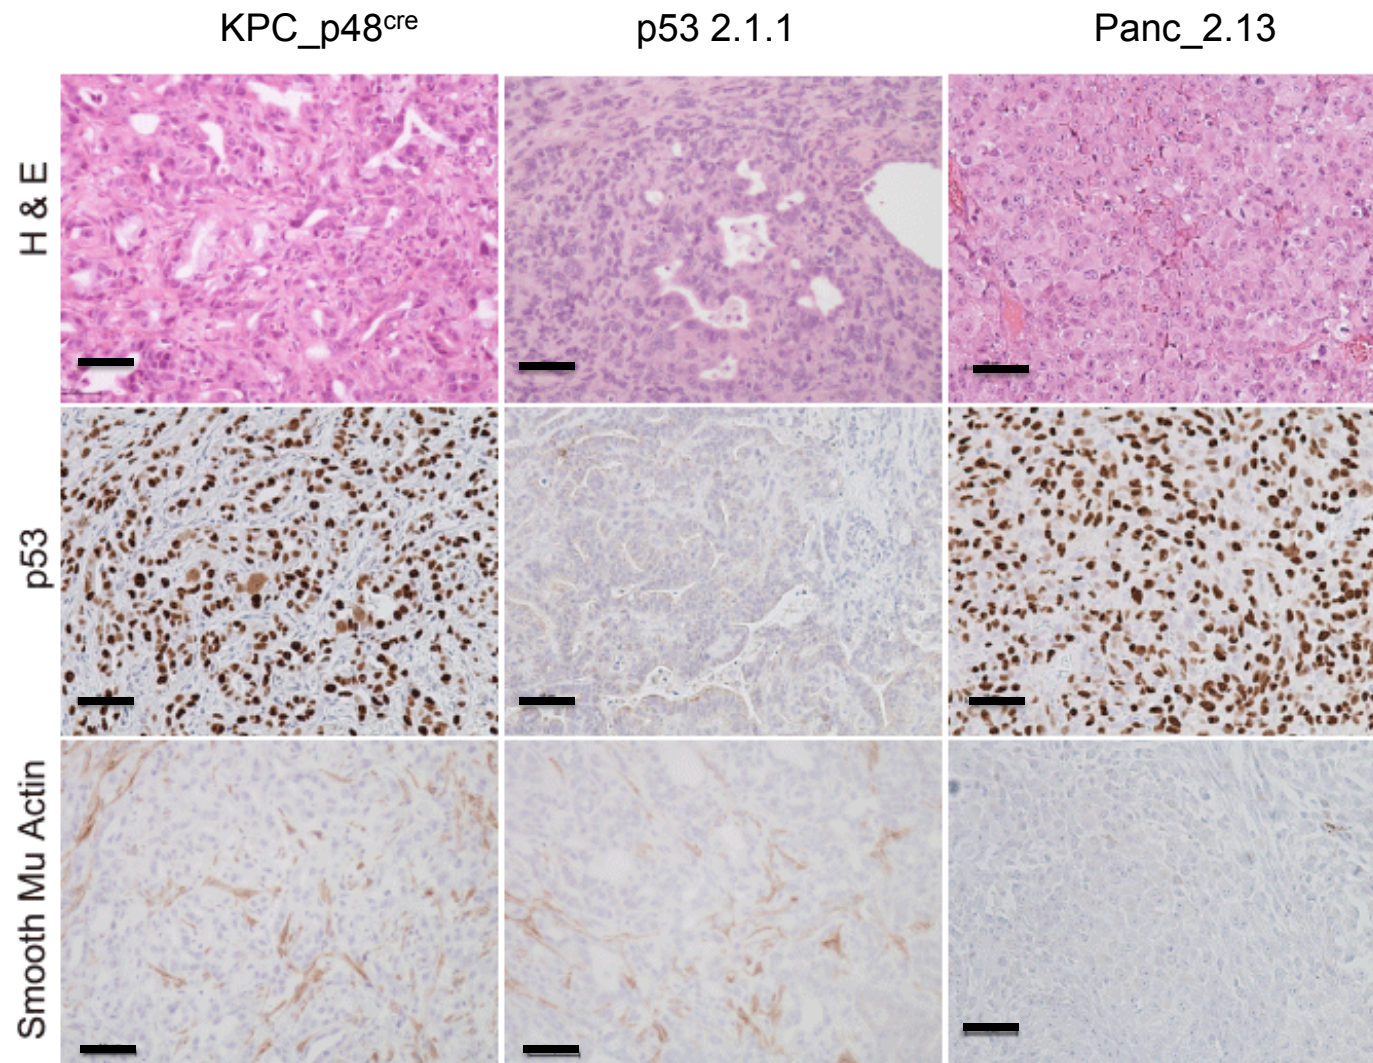

Supplementary Figure 3

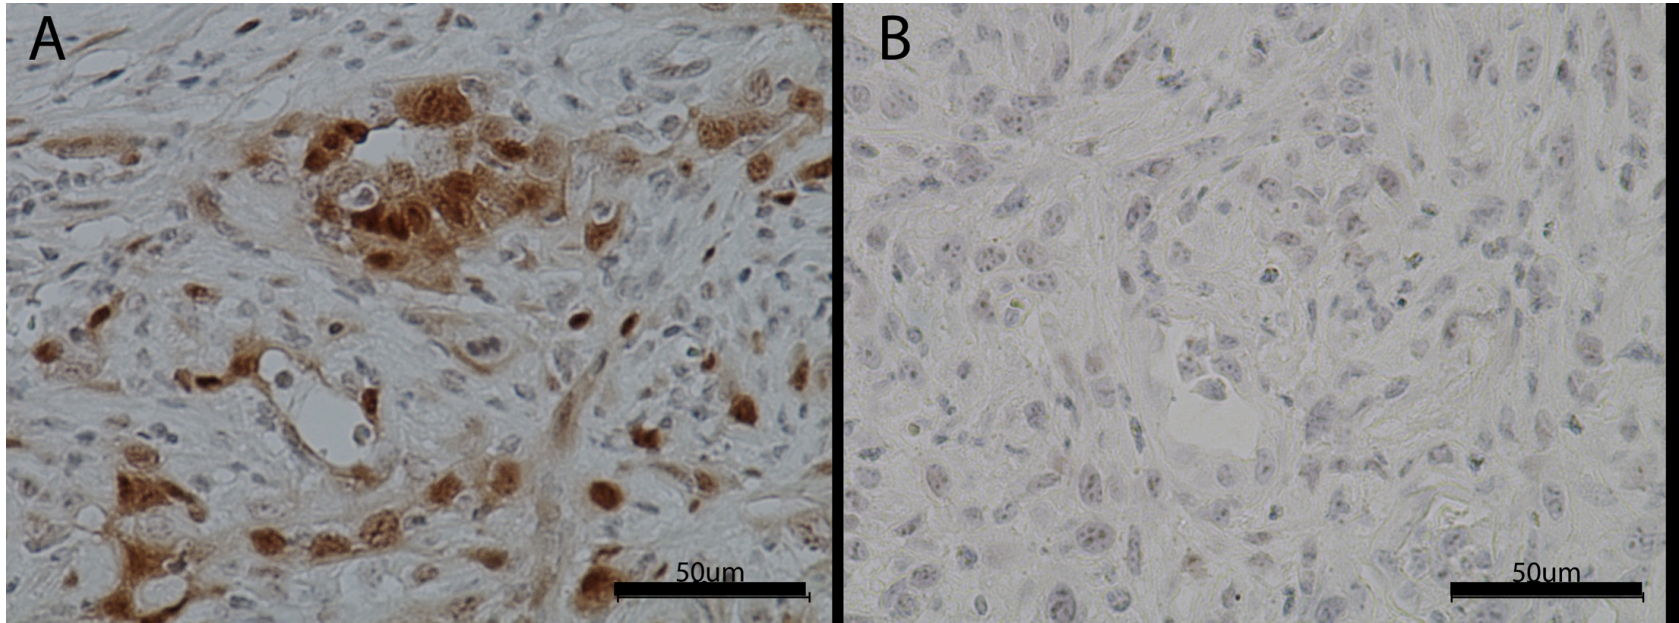

Relative Proliferation to control treated cells

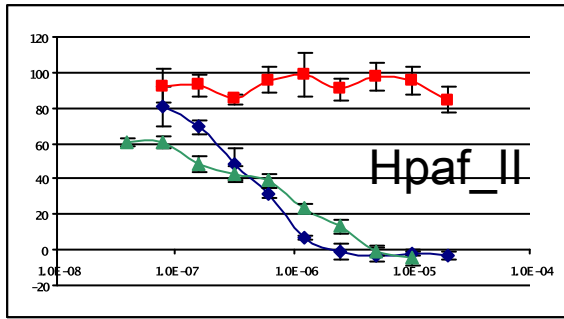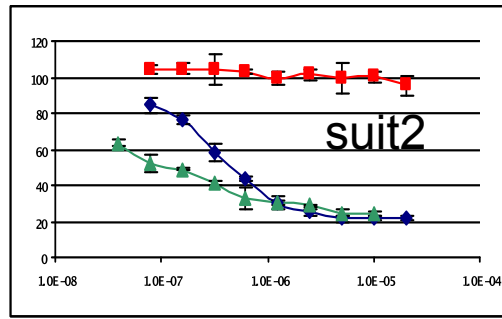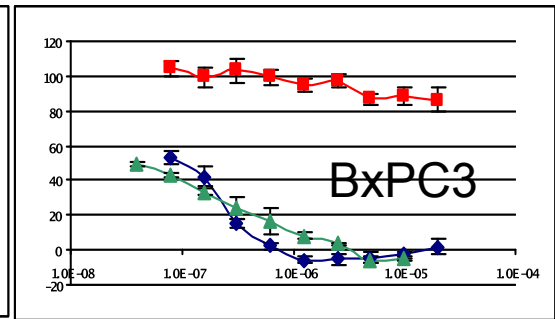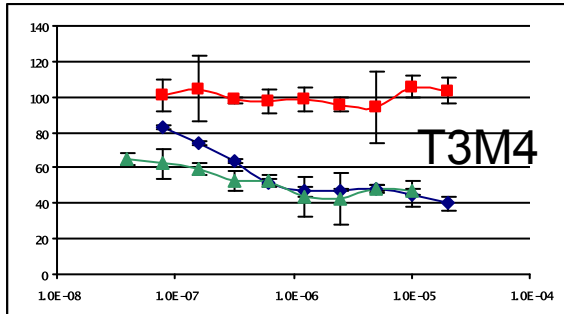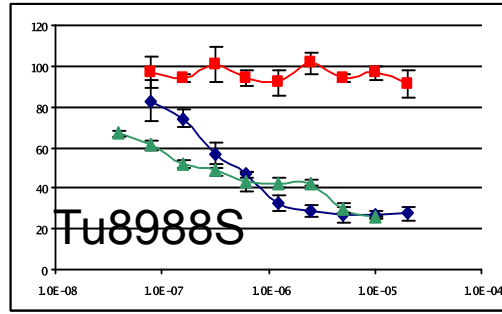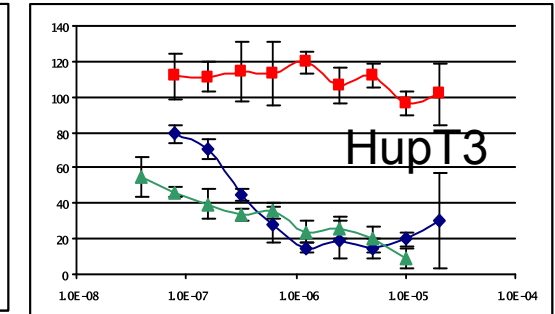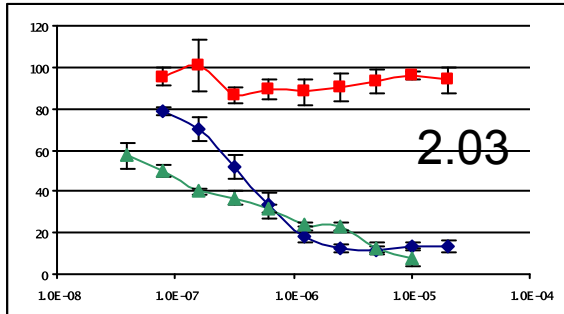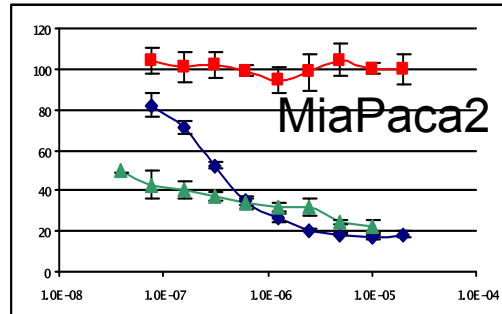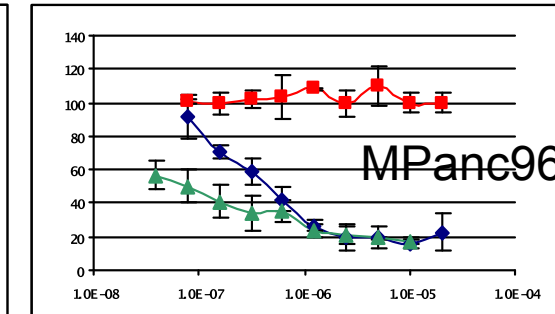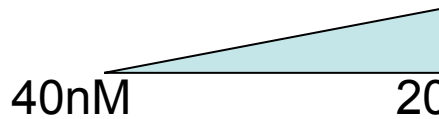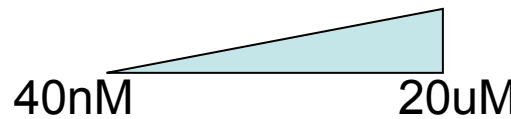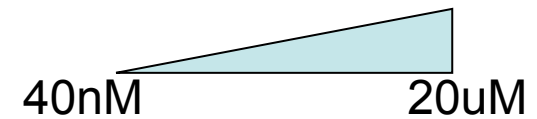

Supplementary Figure 4a

- GDC0879
- PD325901
- GDC0874+PD325901 (2:1 molar ratio)

# Supplementary Figure 4b

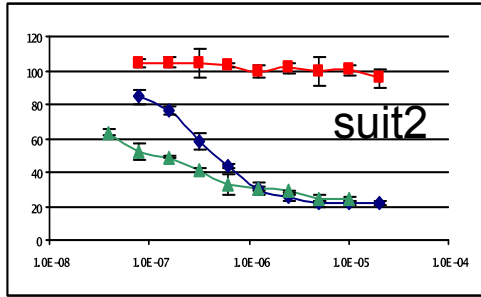

40nM 20uM

- GDC0879 (Raf Inhibitor)
- PD325901
- GDC0874+ PD325901

DMSO      GDC 60nM      GDC 60nM      PD 30nM      PD 30nM      DMSO      PD 30nM+ GDC 60nM      PD 30nM+ GDC 60nM

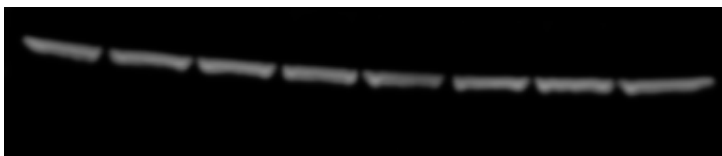

actin

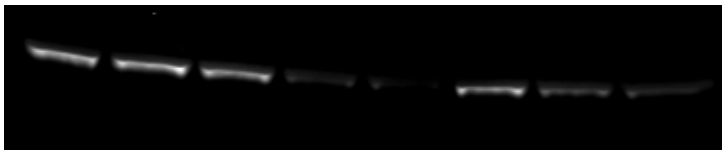

pERK



# Supplementary Figure 5

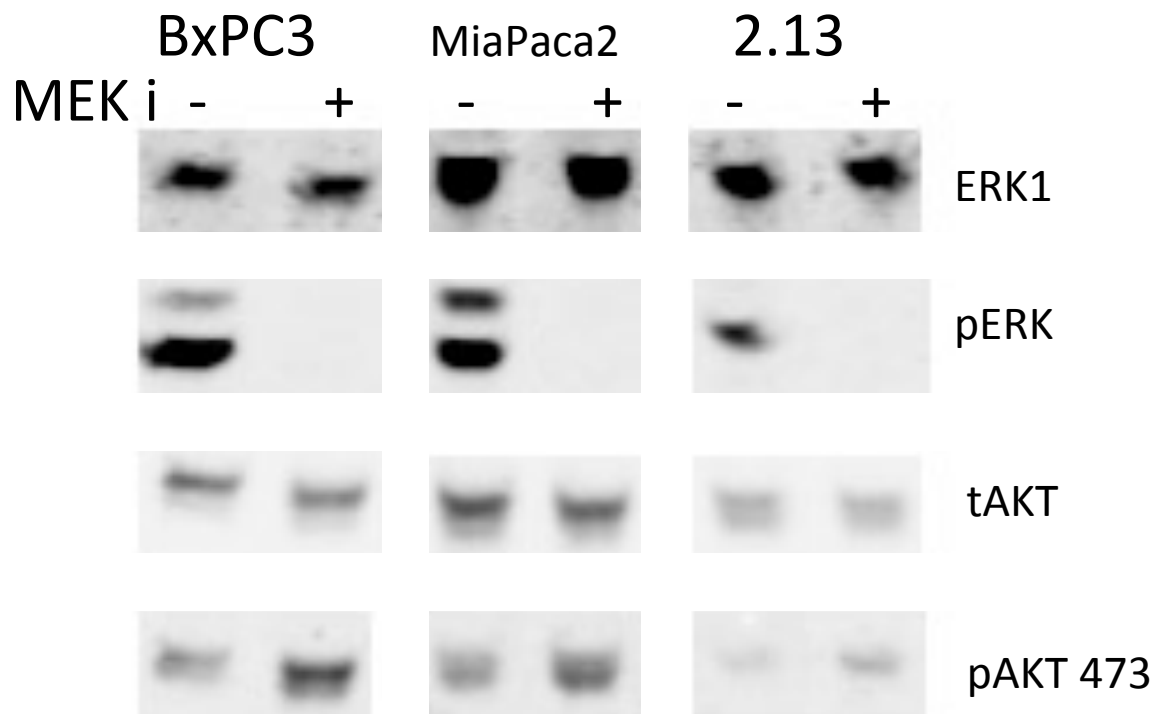

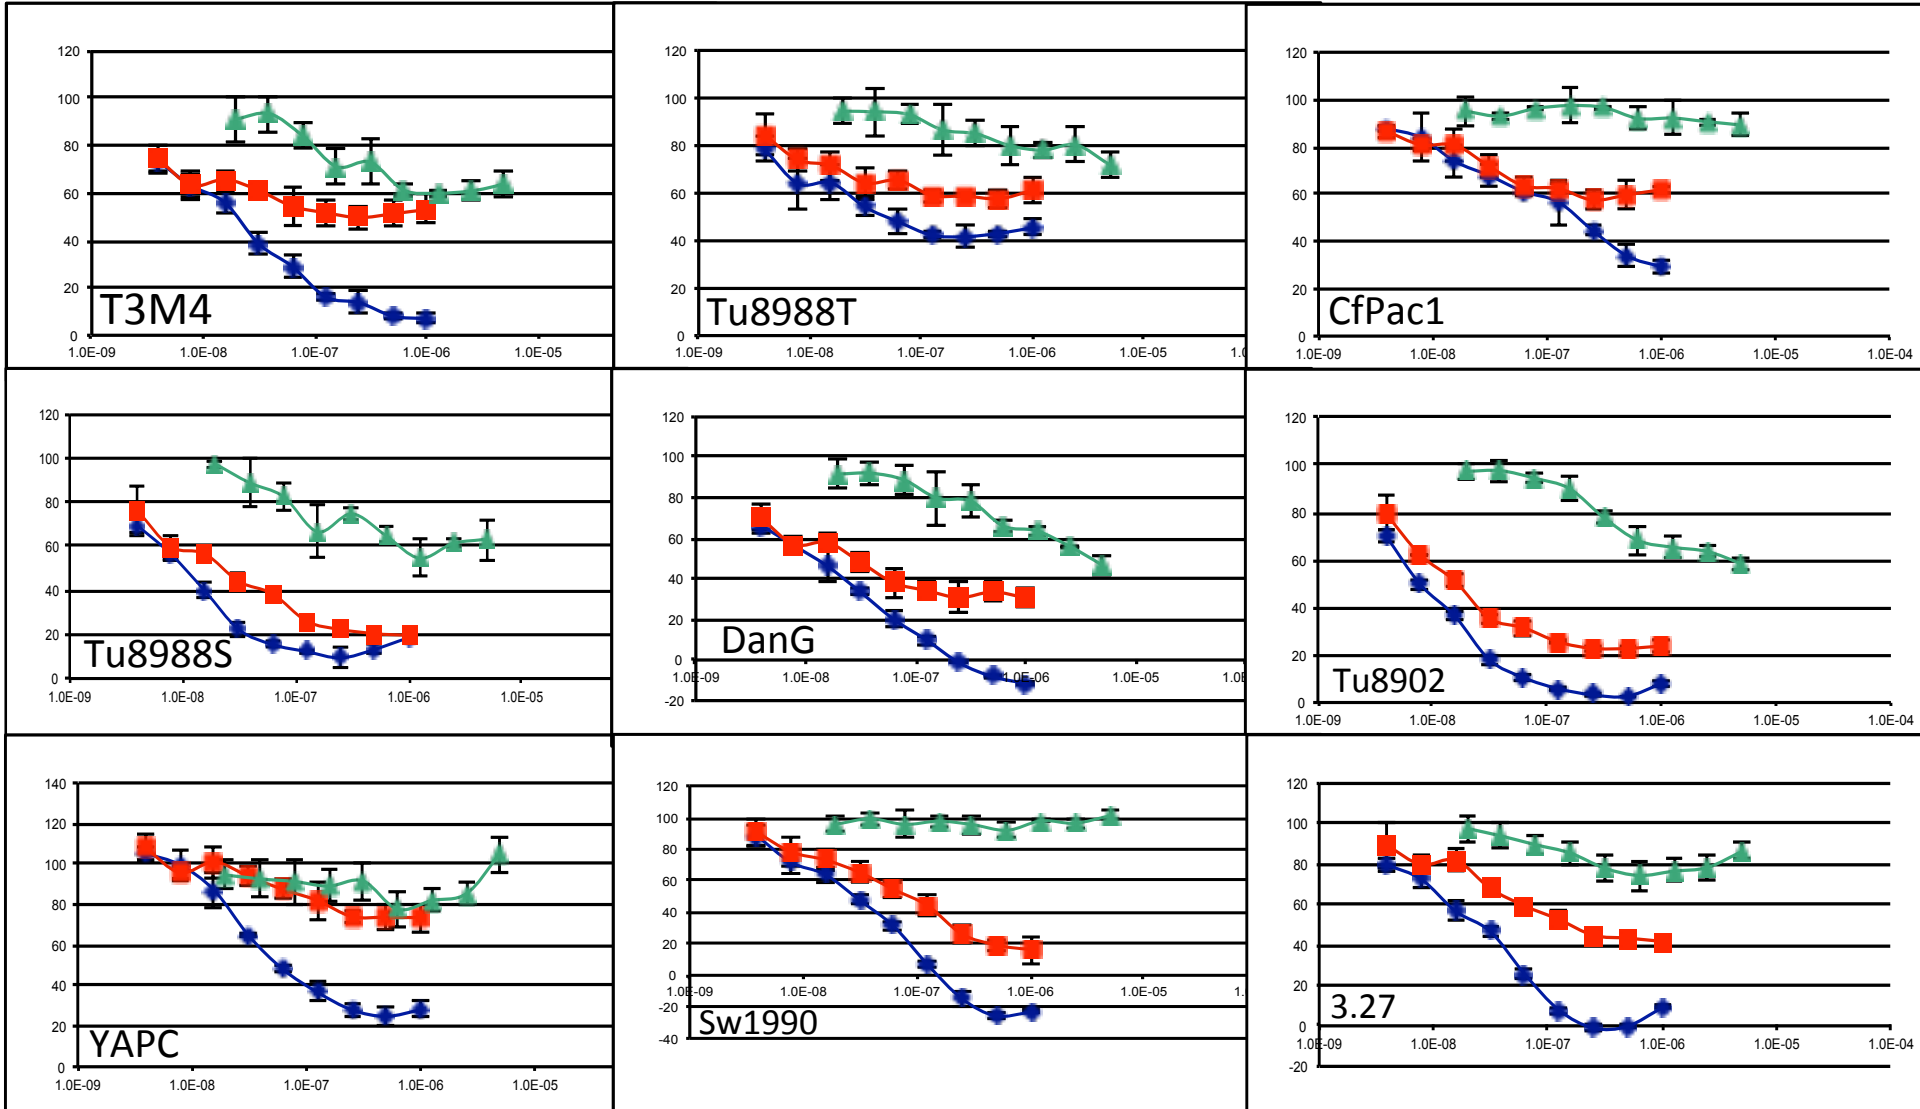

Supplementary Figure 6 (pg 1 of 2)

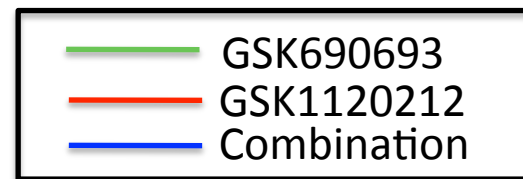

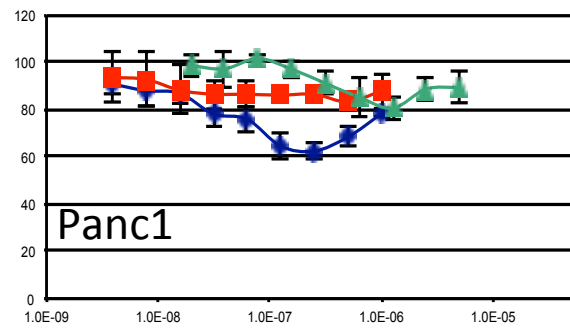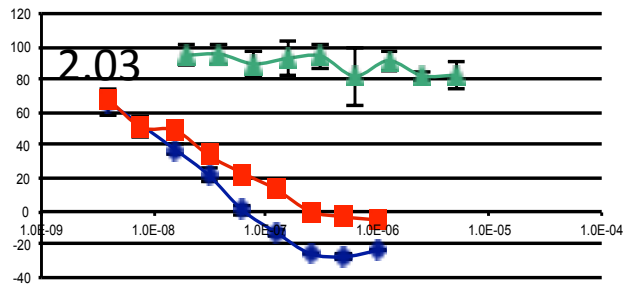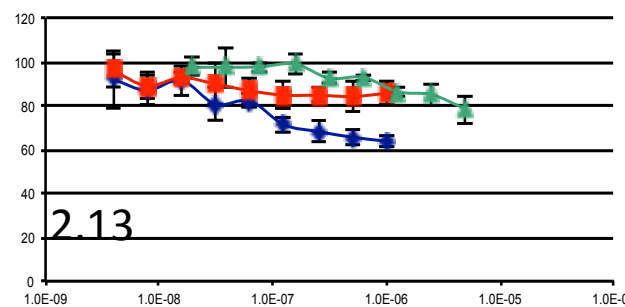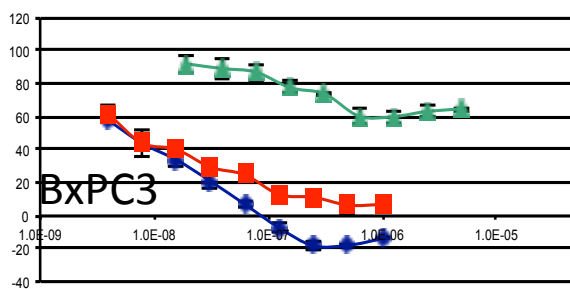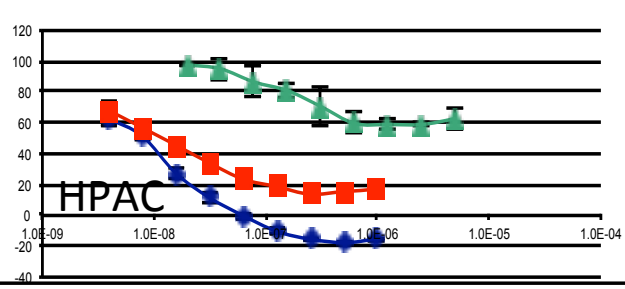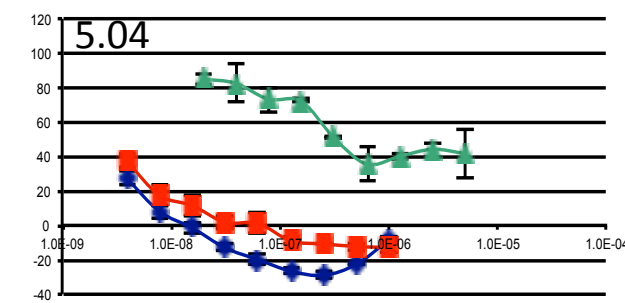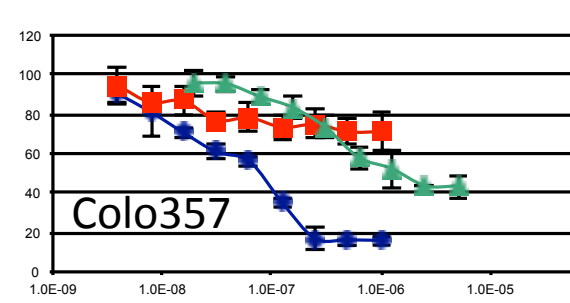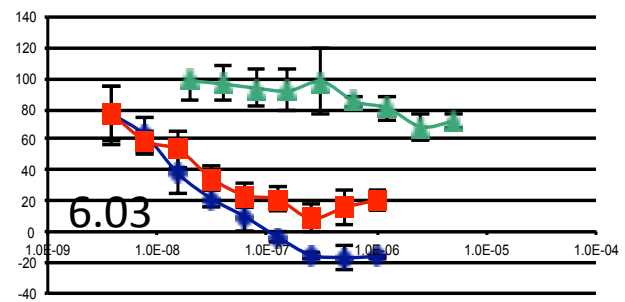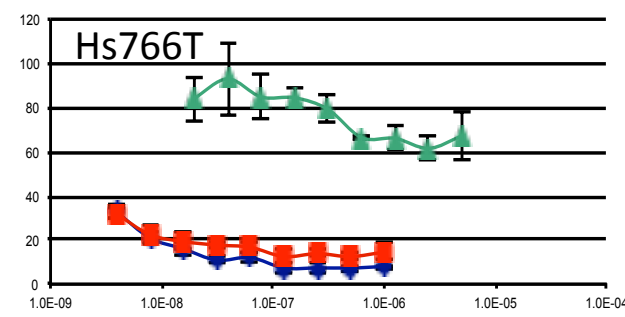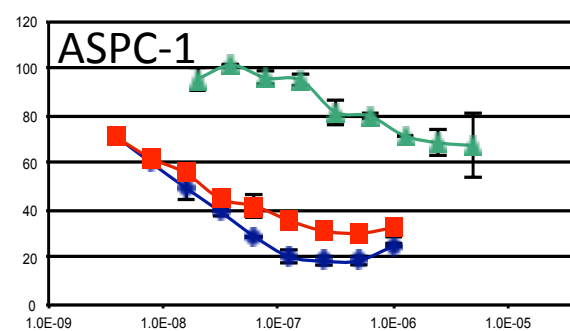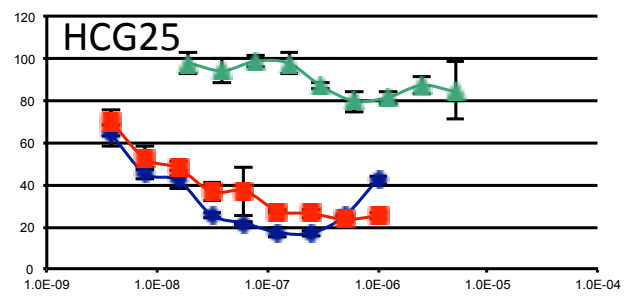

Supplementary Figure 6  
(pg 2 of 2)

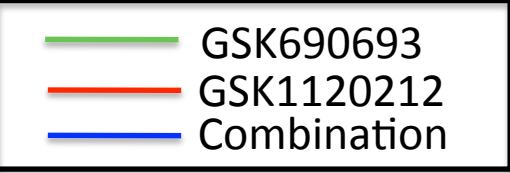

Supplement: NIHMS391758-supplement-Supp_Data.pdf [file NIHMS391758-supplement-Supp_Data.pdf]
